# Supplementary material for: Machine learning-guided engineering of genetically encoded fluorescent calcium indicators
Source: Springer Nature journal article supplement (doi:10.1038/s43588-024-00611-w), 2024-03-21
Supplement: 43588_2024_611_MOESM1_ESM.pdf [file 43588_2024_611_MOESM1_ESM.pdf]

# Machine learning-guided engineering of genetically encoded fluorescent calcium indicators

---

In the format provided by the authors and unedited

---

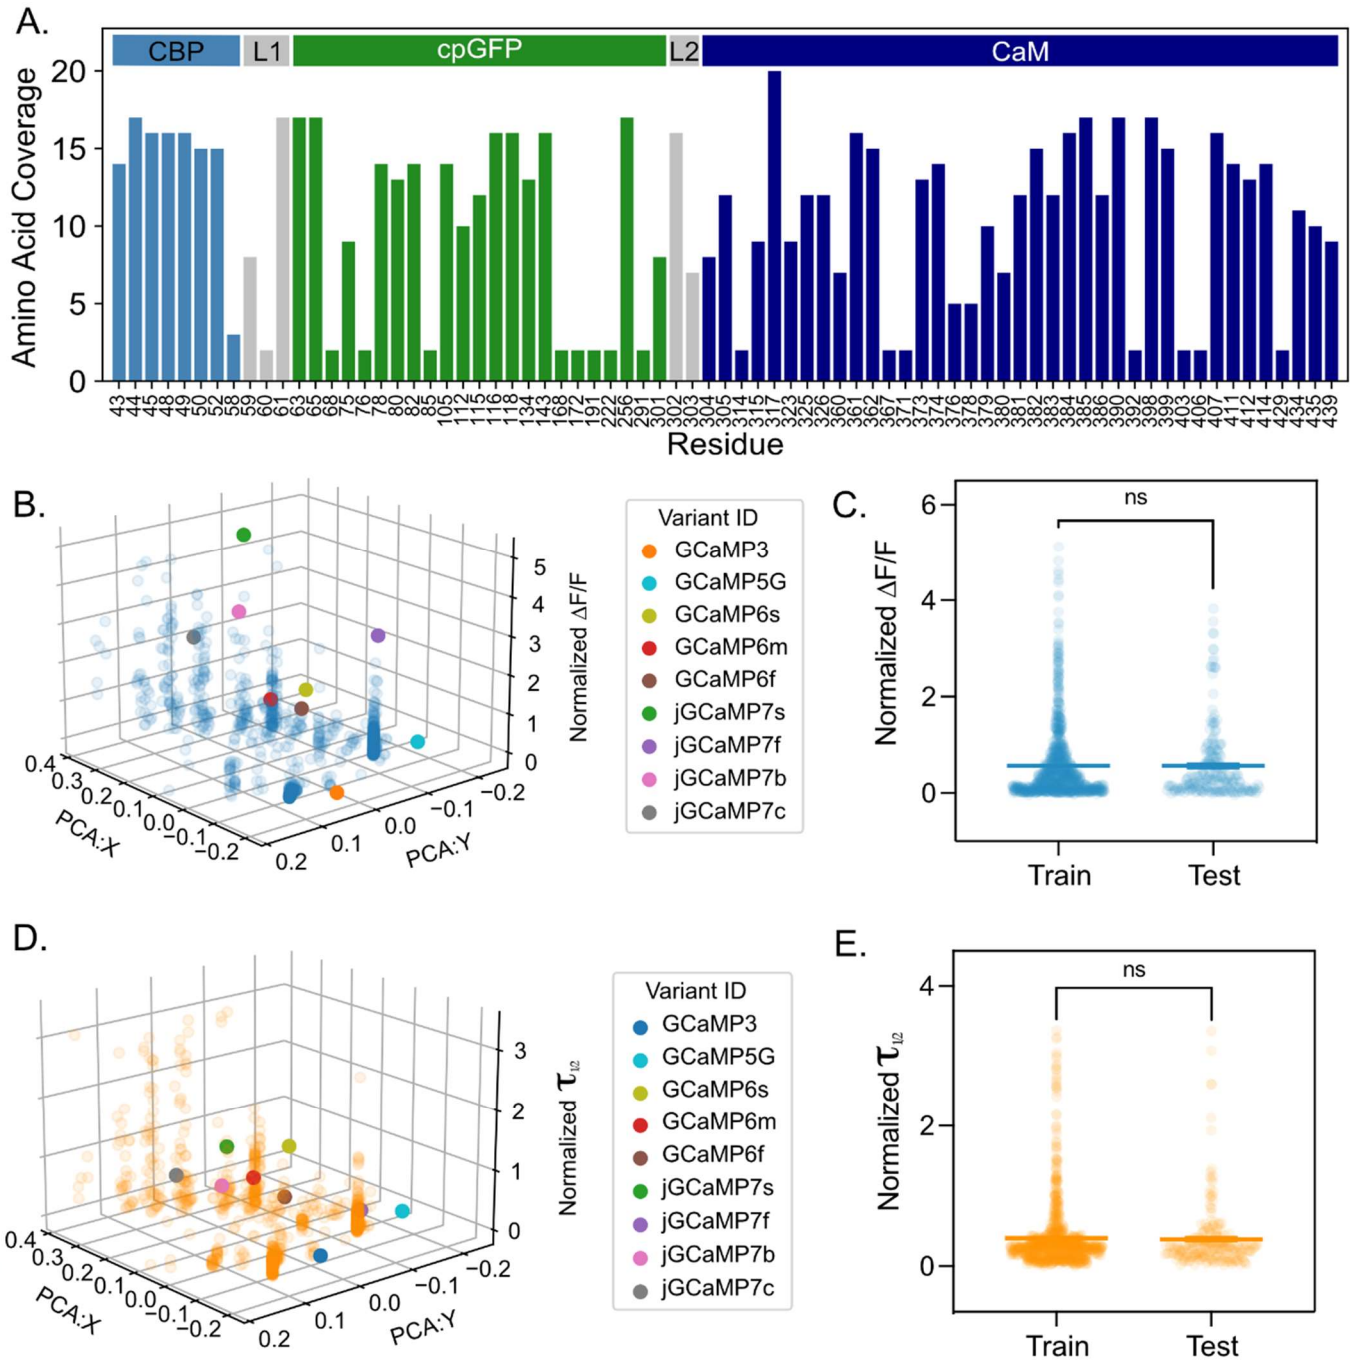

Supplementary Figure 1: *Mutation Scope of Chen & Dana dataset & Train/Test Breakdown*

A. Bar plot depicts the number of tested amino acids for each residue in the full variant library. Color coding indicates the location within the GCaMP protein, light blue indicates the residue is in the CBP, gray indicates the residue is in one of the two linkers, green indicates the residue is in the cpGFP, and dark blue indicates the residue is in the CaM (x-axis denotes residue number, bar height indicates # of amino acids).

- B. 2D principal component analysis (PCA) of sequences contained in the full variant library with the third dimension displaying the normalized  $\Delta F/F_0$  of each variant. Published variants are included as differentially colored dots, indicated in the legend.
- C. Span of Normalized  $\Delta F/F_0$  values in the train set (n=862) and the test set (n=216). Each dot indicates one variant, where the line designates the mean and error bars SEM. Average values and distribution did not differ between the two sets. (ns = P-value>0.05, unpaired t-test, two-tailed)
- D. 2D PCA of sequences contained in the full variant library with the third dimension displaying the normalized  $\tau_{1/2}$  of each variant. Published variants are included as differentially colored dots, indicated in the legend.
- E. Span of Normalized  $\tau_{1/2}$  values in the train set (n=862) and the test set (n=216). Each dot indicates one variant, where the line designates the mean and error bars SEM. Average values and distribution did not differ between the two sets. (ns = P-value>0.05, unpaired t-test, two-tailed)

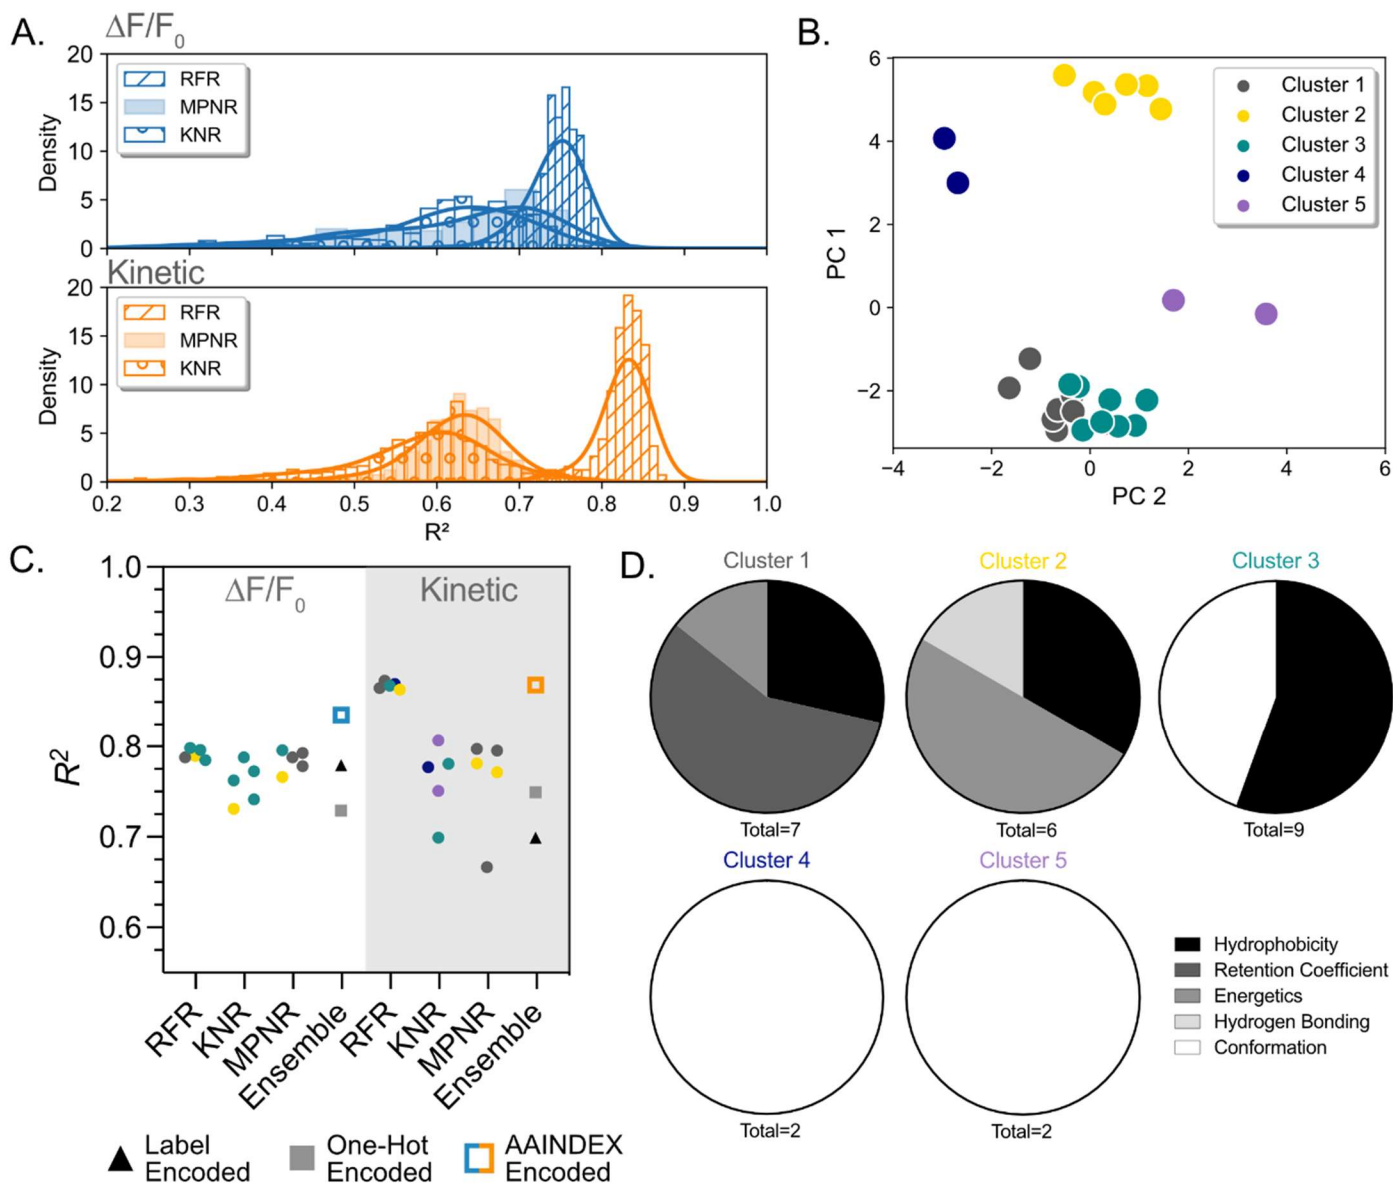

Supplementary Figure 2:  $\Delta F/F_0$  and Kinetics Ensembles Display Amino Acid Property Preference

- Kernel density estimates depict the range of the max  $R^2$  values saved for each of the 554 amino acid property datasets optimized for both ensembles. Bar patterning designates regressor type. The top five performing property datasets were advanced for downstream analysis.
- Principal component analysis of the values in the top datasets from each ensemble (2x15 datasets). (number of components = 4, number of clusters = 5).
- Scatter plot of  $R^2$  values from the top five performing amino acid matrices for each regressor type within each ensemble. Color mapping is indicative of PCA cluster identity (B.). Ensemble  $R^2$  indicates the final  $R^2$  value of predictions from each contributor model after averaging for the indicated encoding method.

Models belonging to the  $\Delta F/F_0$  library are plotted on a transparent background, and models belonging to the kinetic library are plotted on an opaque background.

- D. Pie-charts depict the amino acid properties that were found in each PCA cluster. Total indicates the number of property matrices within the cluster. Name and name color coordinate with B./C.

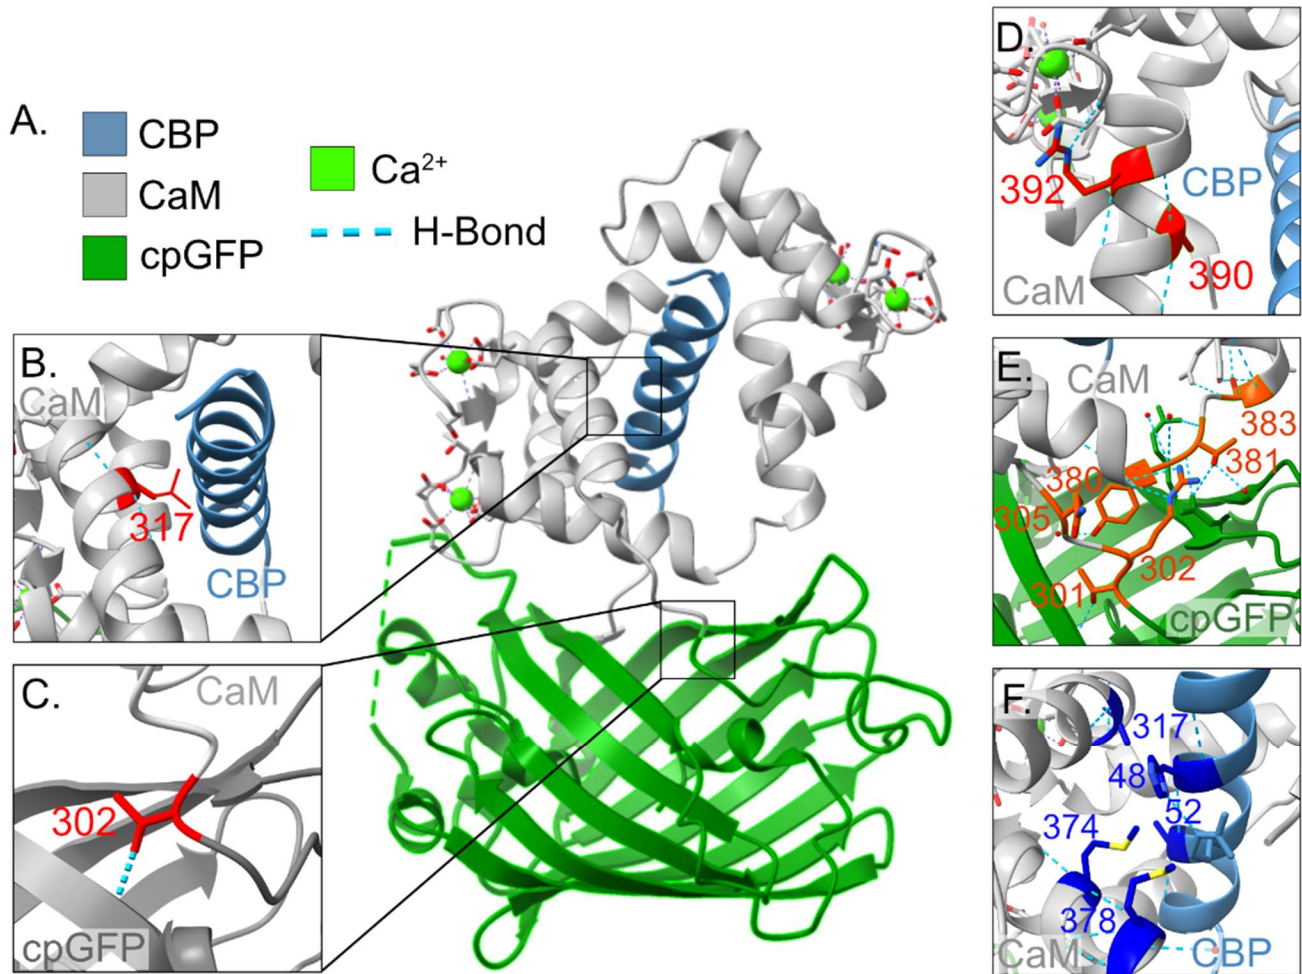

Supplementary Figure 3: *In Silico* Predictions Indicate Key Residues and Interactions Within GCaMP Protein

- A. Crystal structure of GCaMP3 D380Y (RCSB: 3SG3), with color mapped CaM (gray), CBP (light blue), cpGFP (dark green), Ca<sup>2+</sup> (lime green), and hydrogen bonds (light blue dashed lines).
- B. Residue 317 (red) on the interface of CaM (gray) and CBP (light blue).
- C. Residue 302 (red), on linker between CaM (light-gray) and cpGFP (dark-gray), with hydrogen bonds (light blue dashed lines).
- D. Residue 390 (red, left), interfacing with the EF-hand motif, and residue 392 (red, right) interfacing with CBP (light blue), with color-mapped CaM (gray).
- E. Representative image of residues 301, 302, 305, 380, 381, and 383 (dark orange) proximity on the crystal structure with color-mapped CaM (gray) and cpGFP (dark green).
- F. Representative image of residues 48, 52, 317, 374, and 378 (dark blue) proximity on the crystal structure with color-mapped CaM (gray) and CBP (light blue).

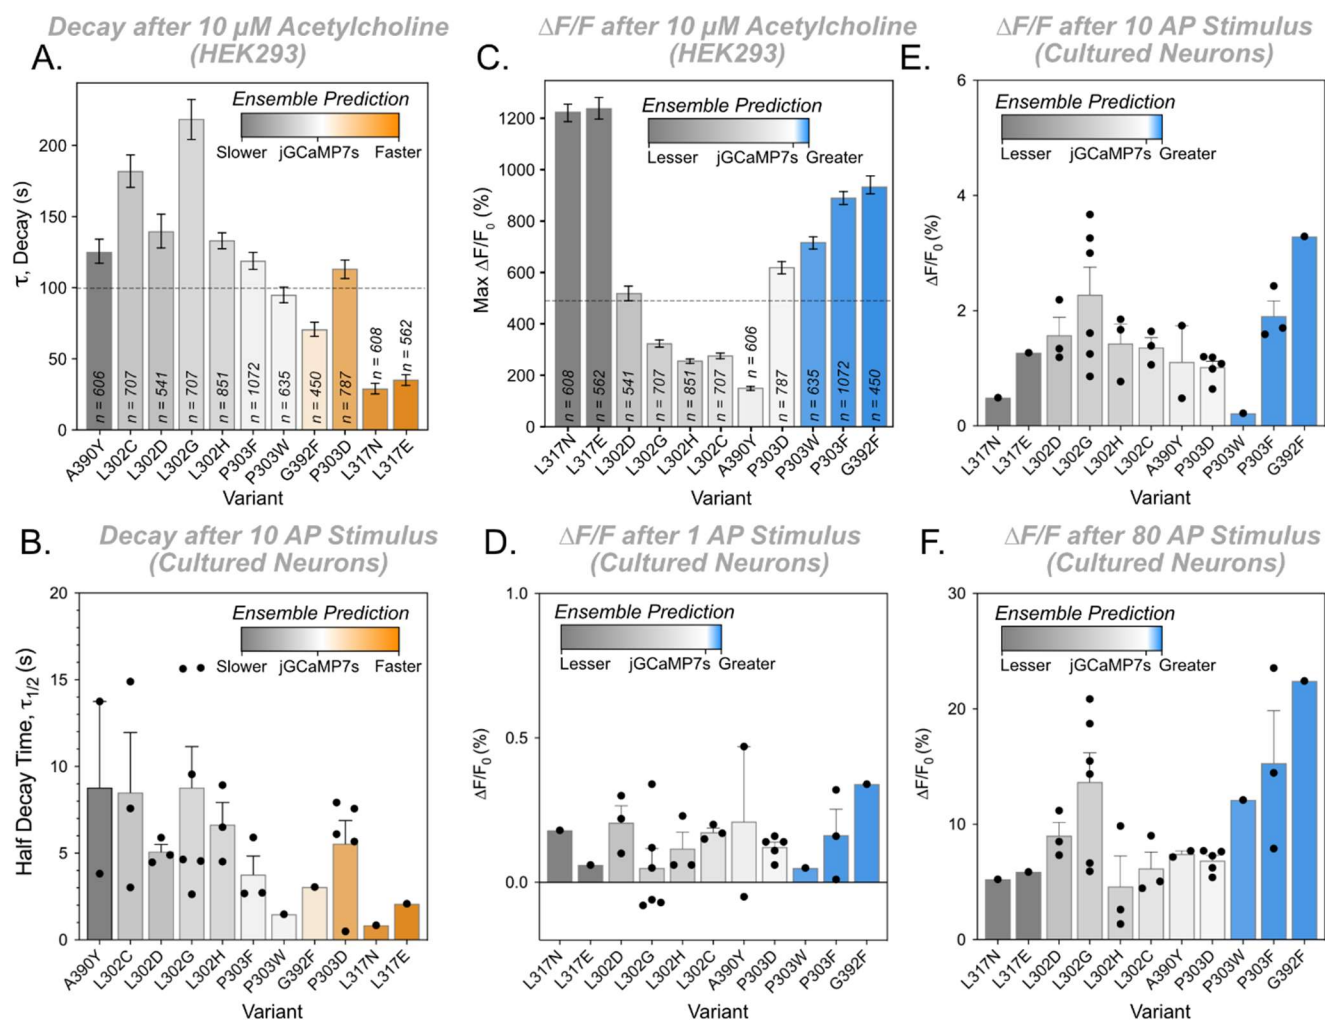

Supplementary Figure 4: Comparison of Single Point Mutation Results in HEK293 and Cultured Neuron Screens

- Decay values ( $\tau$ , tau, Eq.4) obtained from each mutant of jGCaMP7s expressed in HEK293 cells and stimulated with ten  $\mu\text{M}$  acetylcholine. Heat mapping indicates the ensemble's prediction. Mutations are sorted in order of the ensemble's predicted performance. Dotted line depicts mean performance of the base construct, jGCaMP7s. (n = number of cells quantified; bars depict mean + bootstrapped 95% CI).
- Half decay times of each variant of jGCaMP7s expressed in primary cortical neurons and stimulated with 10 APs. Heat mapping indicates the ensemble's prediction. Mutations are sorted in order of the ensemble's predicted performance. (Dots depict cells quantified; bars depict mean + bootstrapped 95% CI).
- Max fluorescent responses (Eq. 1) were obtained from each mutant of jGCaMP7s expressed in HEK293 cells and stimulated with ten  $\mu\text{M}$  acetylcholine. Heat mapping indicates the ensemble's prediction. Mutations are sorted in order of the ensemble's predicted performance. Dotted line depicts mean performance of the base construct, jGCaMP7s. (n = number of cells quantified; bars depict mean + bootstrapped 95% CI).
- Max fluorescent responses (Eq.1) of each variant of jGCaMP7s expressed in primary cortical neurons and stimulated with 1 AP. Heat mapping indicates the ensemble's prediction. Mutations are sorted in order of the ensemble's predicted performance. (Dots depict cells quantified; bars depict mean + bootstrapped 95% CI).

- E. Max fluorescent responses (*Eq. 1*) of each variant of jGCaMP7s expressed in primary cortical neurons and stimulated with 10 AP. Heat mapping indicates the ensemble's prediction. Mutations are sorted in order of the ensemble's predicted performance. (Dots depict cells quantified; bars depict mean + bootstrapped 95% CI).
- F. Max fluorescent responses (*Eq. 1*) of each variant of jGCaMP7s expressed in primary cortical neurons and stimulated with 80 AP. Heat mapping indicates the ensemble's prediction. Mutations are sorted in order of the ensemble's predicted performance. (Dots depict cells quantified; bars depict mean + bootstrapped 95% CI).



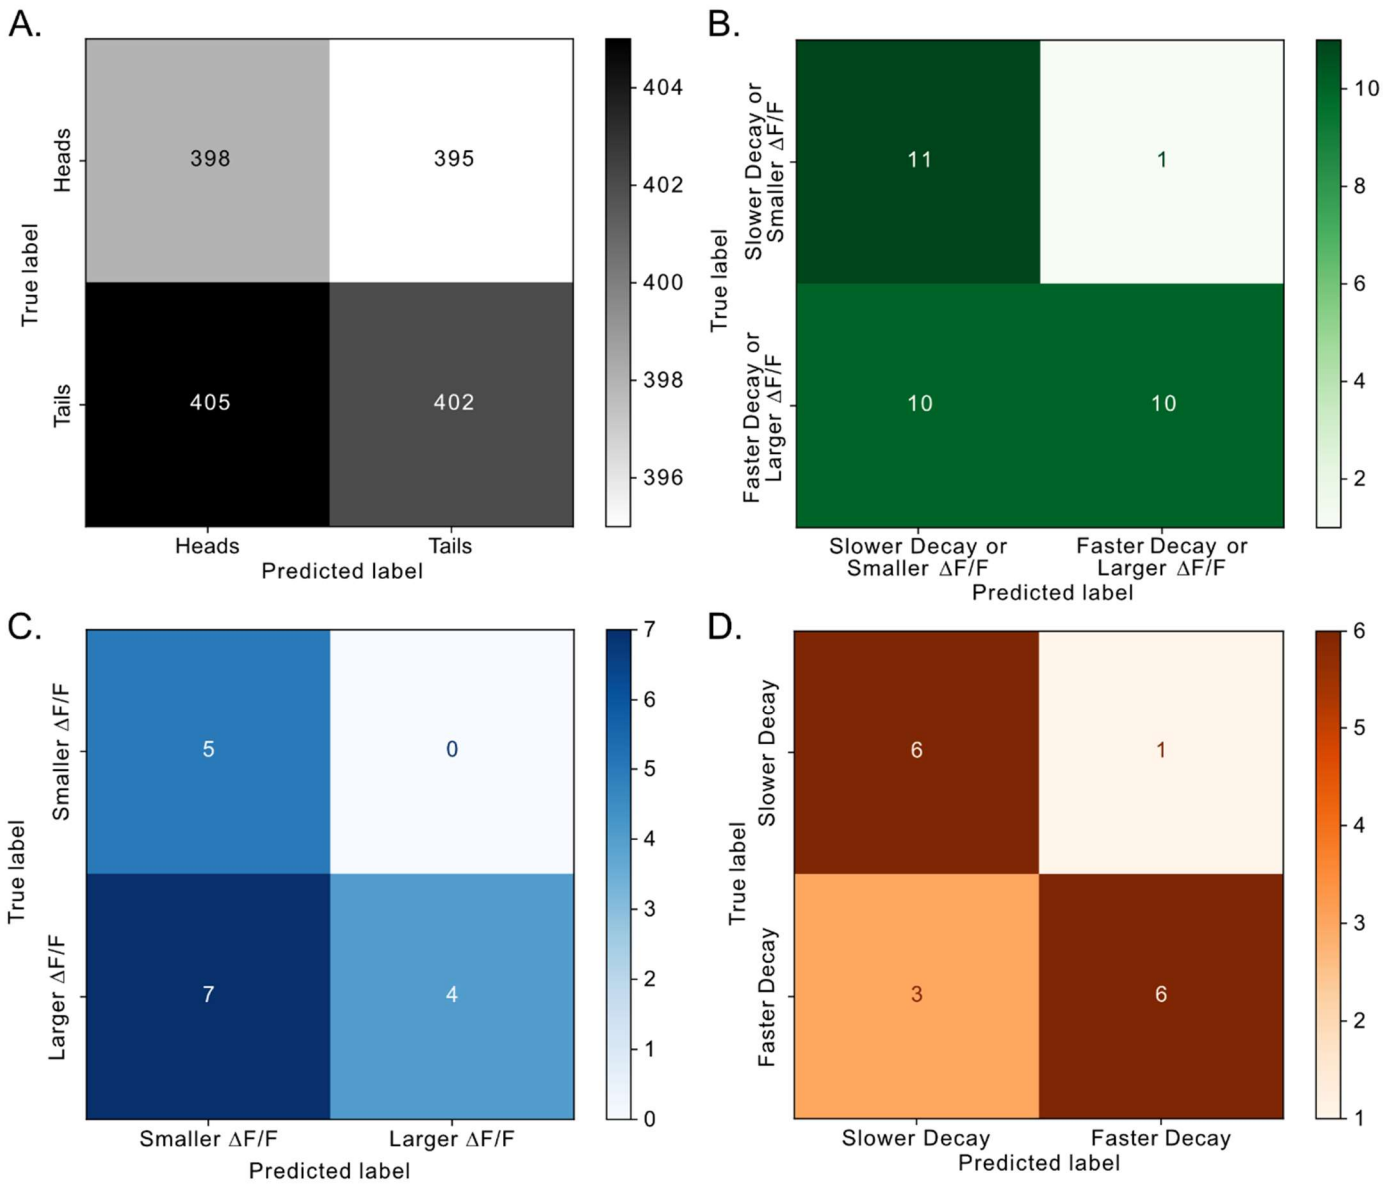

Supplementary Figure 5: *Estimation of Model Accuracy with Acetylcholine Results.*

- A. Confusion Matrix of 100 simulated coin flip experiments (each containing 16 samples).
- B. Confusion matrix of both models' predictions and acetylcholine performance.
- C. Confusion matrix of all fluorescence model's predictions and acetylcholine performance.
- D. Confusion matrix of all kinetics model's predictions and acetylcholine performance.

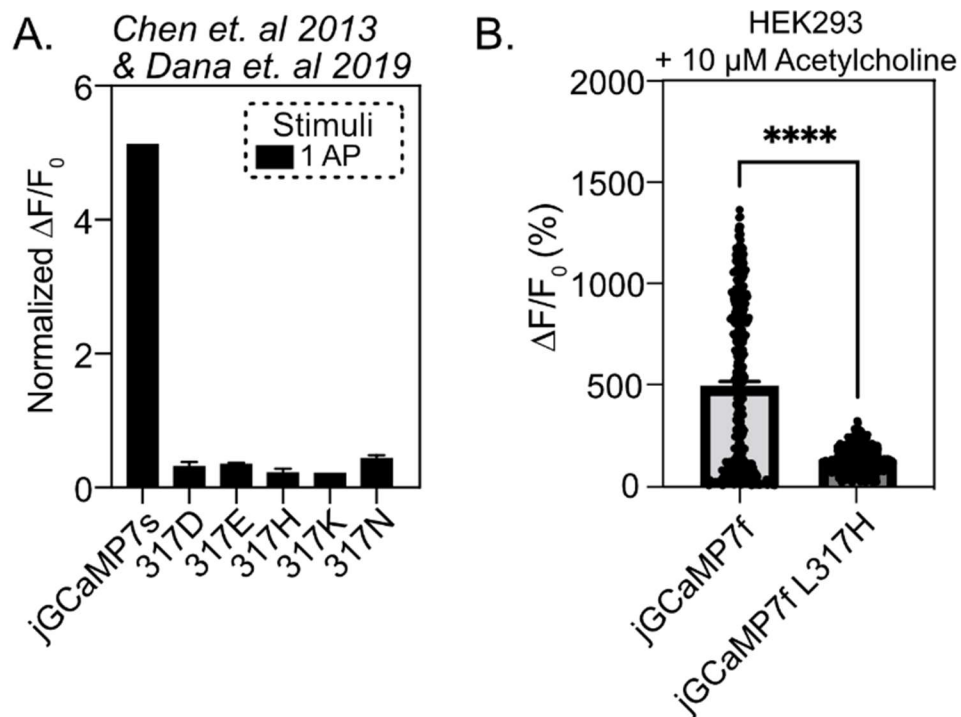

Supplementary Figure 6: *Retroactive Assessment of Ensemble Predictions Compared to In Vitro Behaviors*

- A. Normalized fluorescent responses to indicated stimuli in cultured neurons, obtained from the *Chen et al. 2013* and *Dana et al. 2019* variant library (bars depict mean + SEM (if applicable)).
- B. Max fluorescent responses obtained from listed variants expressed in HEK293 cells and stimulated with acetylcholine. (dots indicate analyzed cells; bars depict mean + SEM, \*\*\*\* =  $<0.0001$  (unpaired t-test, two-tailed)). [jGCaMP7f = 497.6 (SEM: 22.15; n=353); jGCaMP7f L317H = 130.7 (SEM: 3.57; n=330)].

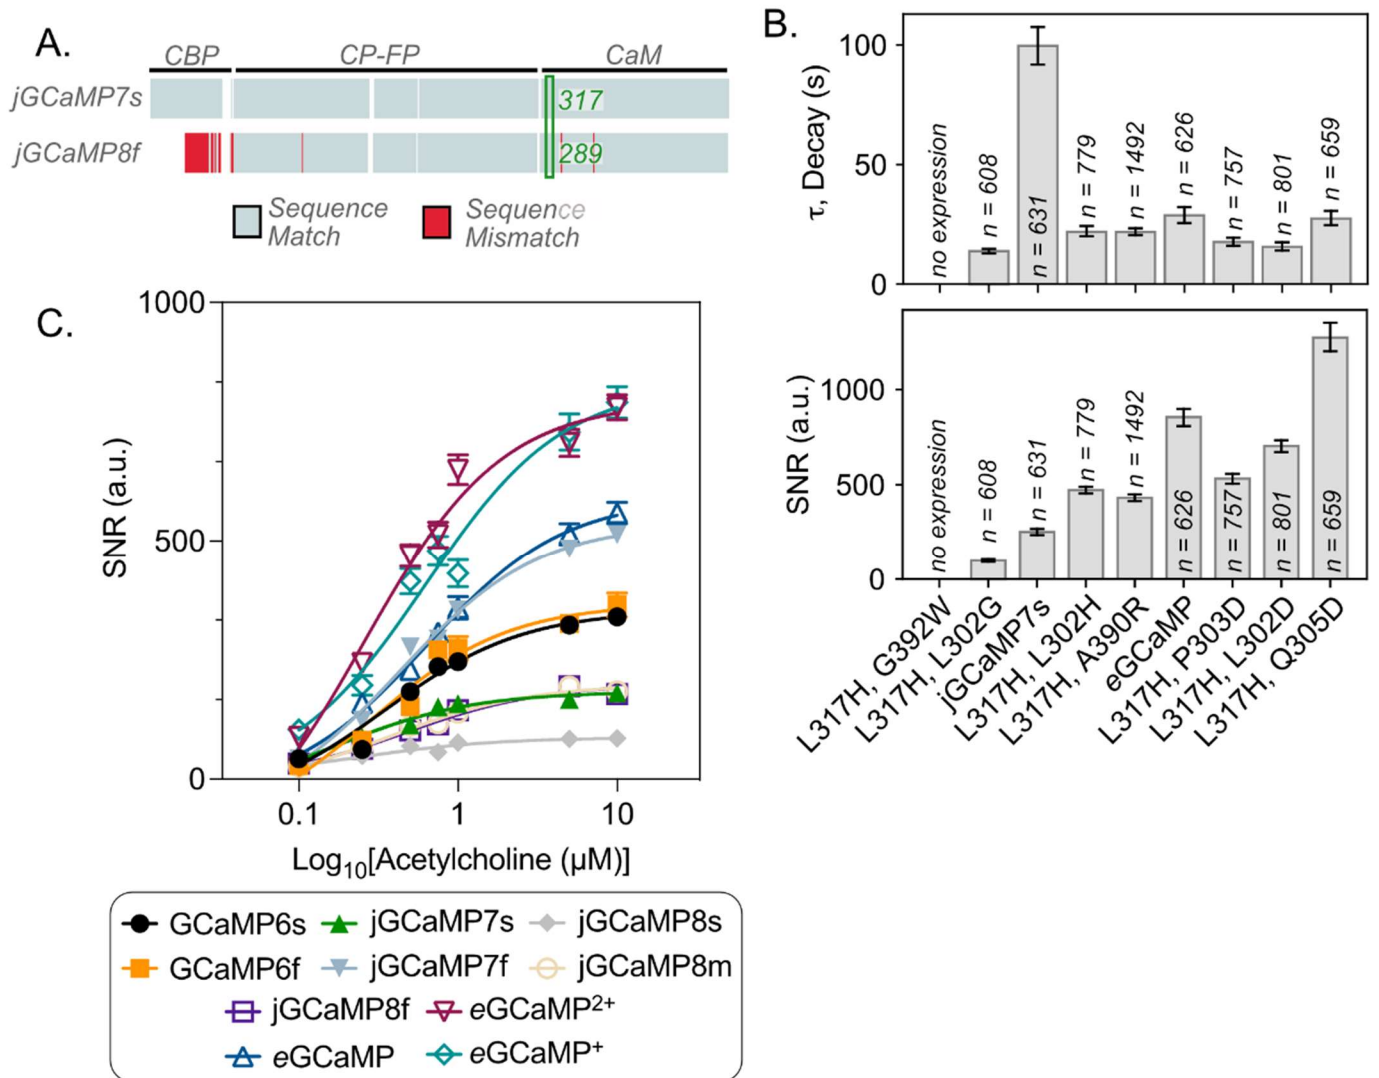

Supplementary Figure 7: *Combinatorial Mutation Biophysical Characteristics and Basis for Mutation Transfer*

A. Sequence alignment of jGCaMP7s and jGCaMP8f. Light gray indicates identical sequence alignment, and red indicates sequence dissimilarities. Breaks indicate a missing sequence portion caused by additional sequence portions in other constructs. The physical location of the residue L317 in jGCaMP7s is designated with the green box and the residue number of the matching location is included as green text over the sequence. Text along the top of the sequence depicts the physical location in the GCaMP protein: CBP, CaM, or circularly permuted fluorescent protein (cpFP).

B. Decay values ( $\tau$ , tau, Eq. 4) obtained from each combinatorial mutant of jGCaMP7s expressed in HEK293 cells and stimulated with 10  $\mu$ M acetylcholine. Mutations are sorted according to  $\Delta F/F_0$  performance (n = the number of cells quantified; bars depict mean + bootstrapped 95% ci). Signal-to-noise ratio (SNR, Eq. 4) obtained from each combinatorial mutant of jGCaMP7s expressed in HEK293 cells and stimulated with

10  $\mu\text{M}$  acetylcholine. Mutations are sorted according to  $\Delta F/F_0$  performance ( $n$  = the number of cells quantified; bars depict mean + bootstrapped 95% ci).

- C. Signal-to-noise ratio (SNR, *Eq.4*) of indicated variant, expressed in HEK293 cells and stimulated with different acetylcholine concentrations (x-axis). Plotted points indicate the mean SNR response for each variant to indicated stimuli, and error bars display the SEM. The solid line depicts the non-linear fit of scatter data.

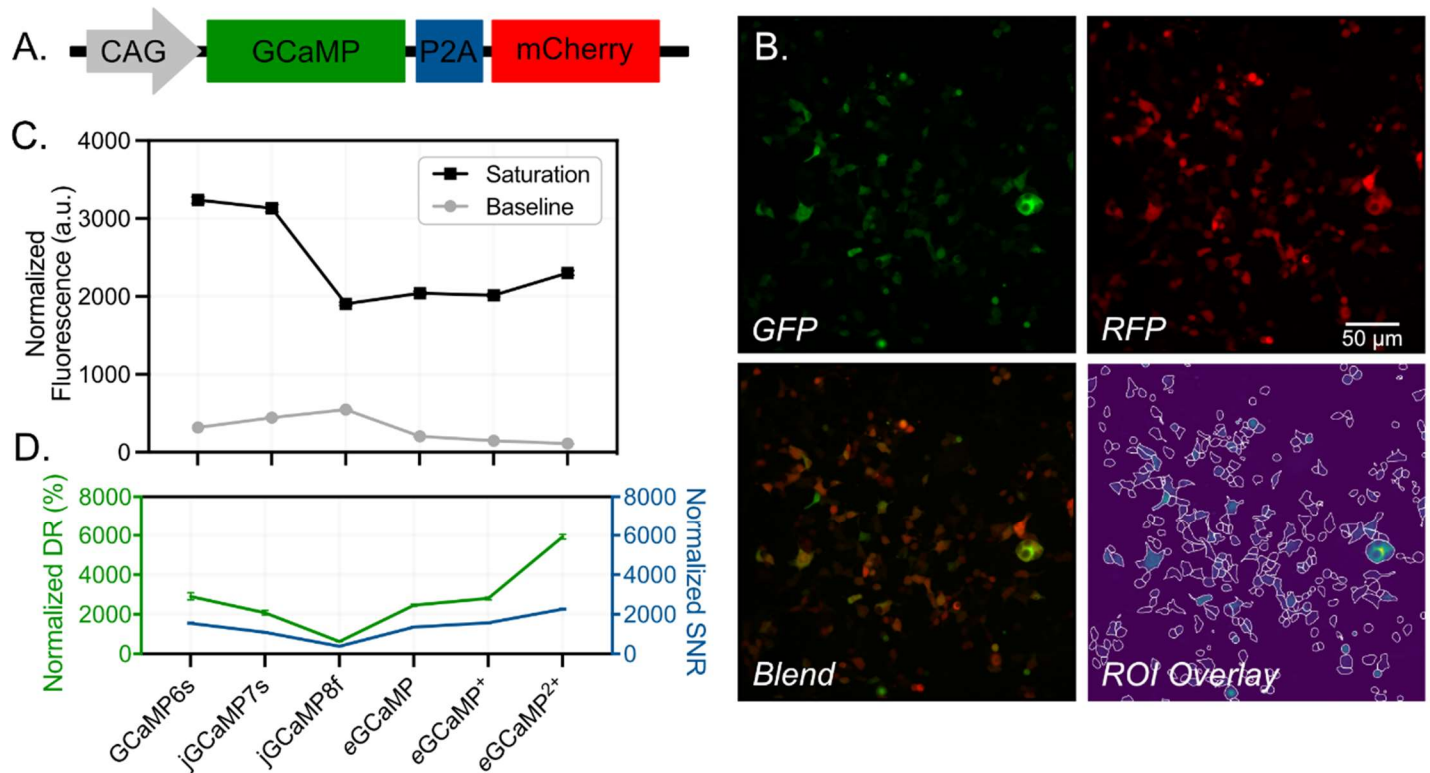

Supplementary Figure 8: *Ratiometric analysis of baseline fluorescence for eGCaMP, eGCaMP<sup>+</sup>, and eGCaMP<sup>2+</sup>*

- GCaMP variants GCaMP6s, jGCaMP7s, jGCaMP8f, eGCaMP, eGCaMP<sup>+</sup>, eGCaMP<sup>2+</sup> were cloned into a CAG driven vector, with a mCherry control fluorophore added after a self-cleaving motif (P2A) within the reading frame.
- Representative images taken with 488 nm wavelength excitation (GFP), 585nm wavelength excitation (RFP), an overlap of the two channels depicting the ratio of GFP intensity to RFP intensity (Blend), and the Cellpose derived ROIs used for analysis (ROI overlay). The scale bar depicts 50 $\mu$ m.
- Normalized fluorescence intensity of each ratiometric variant (x-axis shared with D.) at baseline (gray) and saturation conditions (black). Scatter points depict mean value and error bars depict SEM.
- Normalized dynamic range (DR, green, left y-axis) and signal-to-noise ratio (SNR, blue, right y-axis) for each ratiometric variant (x-axis). Scatter points depict mean value and error bars depict SEM. 4 independent biological replicates per construct in **B.**, **C.**, and **D.**

| Fluorescence |            |                |                                                                                           |           |
|--------------|------------|----------------|-------------------------------------------------------------------------------------------|-----------|
| Model        | AAINDEX    | R <sup>2</sup> | Descriptor                                                                                | Cluster # |
| RFR          | ROSM880102 | 0.88           | Side chain hydropathy, corrected for solvation (Roseman, 1988)                            | 2         |
|              | MANP780101 | 0.88           | Average surrounding hydrophobicity (Manavalan-Ponnuswamy, 1978)                           | 3         |
|              | KANM800104 | 0.88           | Average relative probability of inner beta-sheet (Kanehisa-Tsong, 1980)                   | 3         |
|              | JURD980101 | 0.87           | Modified Kyte-Doolittle hydrophobicity scale (Juretic et al., 1998)                       | 3         |
|              | MEEJ810102 | 0.87           | Retention coefficient in NaH <sub>2</sub> PO <sub>4</sub> (Meek-Rossetti, 1981)           | 1         |
| MPNR         | BROC820101 | 0.79           | Retention coefficient in TFA (Browne et al., 1982)                                        | 1         |
|              | ZIMJ680105 | 0.79           | RF rank (Zimmerman et al., 1968)                                                          | 1         |
|              | FAUJ830101 | 0.78           | Hydrophobic parameter pi (Fauchere-Pliska, 1983)                                          | 1         |
|              | CIDH920104 | 0.78           | Normalized hydrophobicity scales for alpha/beta-proteins (Cid et al., 1992)               | 3         |
|              | BULH740101 | 0.77           | Transfer free energy to surface (Bull-Breese, 1974)                                       | 2         |
| KNR          | KANM800104 | 0.77           | Average relative probability of inner beta-sheet (Kanehisa-Tsong, 1980)                   | 3         |
|              | LIFS790102 | 0.77           | Conformational preference for parallel beta-strands (Lifson-Sander, 1979)                 | 3         |
|              | MANP780101 | 0.77           | Average surrounding hydrophobicity (Manavalan-Ponnuswamy, 1978)                           | 3         |
|              | BASU050101 | 0.77           | Interactivity scale obtained from the contact matrix (Bastolla et al., 2005)              | 3         |
|              | MIYS990101 | 0.76           | Relative partition energies derived by the Bethe approximation. (Miyazawa-Jernigan, 1999) | 2         |

Supplementary Table 1:  $\Delta F/F_0$  library encoding dataset information

The table contains the top five performing AAINDEX datasets for each model (RFR, MPNR, KNR). The 'AAINDEX' column pertains to the property dataset's unique identifier within the AAINDEX repository. 'R<sup>2</sup>' is the performance score of the model when trained on the 80% train set and validated with the 20% test set. 'Descriptor' is the description of the property obtained from AAINDEX. 'Cluster #' is derived from the principal component analyses on all property datasets.

| Kinetics |            |                |                                                                                                                           |           |
|----------|------------|----------------|---------------------------------------------------------------------------------------------------------------------------|-----------|
| Model    | AAINDEX    | R <sup>2</sup> | Descriptor                                                                                                                | Cluster # |
| RFR      | ZASB82010  | 0.88           | Dependence of partition coefficient on ionic strength (Zaslavsky et al., 1982)                                            | 1         |
|          | QIAN880130 | 0.88           | Weights for coil at the window position of -3 (Qian-Sejnowski, 1988)                                                      | 4         |
|          | RADA880101 | 0.88           | Transfer free energy from chx to wat (Radzicka-Wolfenden, 1988)                                                           | 1         |
|          | NADH010103 | 0.87           | Hydropathy scale based on self-information values in the two-state model (16% accessibility) (Naderi-Manesh et al., 2001) | 3         |
|          | GUYH850104 | 0.87           | Apparent partition energies calculated from Janin index (Guy, 1985)                                                       | 2         |
| MPNR     | BULH740101 | 0.79           | Transfer free energy to surface (Bull-Breese, 1974)                                                                       | 2         |
|          | FAUJ880110 | 0.79           | Number of full nonbonding orbitals (Fauchere et al., 1988)                                                                | 2         |
|          | ZIMJ680105 | 0.78           | RF rank (Zimmerman et al., 1968)                                                                                          | 1         |
|          | MEEJ800101 | 0.78           | Retention coefficient in HPLC, pH7.4 (Meek, 1980)                                                                         | 1         |
|          | ROSM880101 | 0.77           | Side chain hydropathy, uncorrected for solvation (Roseman, 1988)                                                          | 2         |
| KNR      | PALJ810103 | 0.77           | Normalized frequency of beta-sheet from LG (Palau et al., 1981)                                                           | 3         |
|          | PALJ810107 | 0.77           | Normalized frequency of alpha-helix in all-alpha class (Palau et al., 1981)                                               | 5         |
|          | PALJ810112 | 0.77           | Normalized frequency of beta-sheet in alpha/beta class (Palau et al., 1981)                                               | 3         |
|          | LEVJ780103 | 0.77           | Normalized frequency of reverse turn, with weights (Levitt, 1978)                                                         | 4         |
|          | QIAN880105 | 0.76           | Weights for alpha-helix at the window position of -2 (Qian-Sejnowski, 1988)                                               | 5         |

Supplementary Table 2: *Kinetics library encoding dataset information*

The table contains the top five performing AAINDEX datasets for each model (RFR, MPNR, KNR). The 'AAINDEX' column pertains to the property dataset's unique identifier within the AAINDEX repository. 'R<sup>2</sup>' is the performance score of the model when trained on the 80% train set and validated with the 20% test set. 'Descriptor' is the description of the property obtained from AAINDEX. 'Cluster #' is derived from the principal component analyses on all property datasets.

| $\Delta F/F$ (%) |         |                    |                   |
|------------------|---------|--------------------|-------------------|
| Variant          | Mean    | 95% CI             | ROIs Measured (n) |
| L317N            | 1224.53 | [1188.62, 1257.82] | 608               |
| L317E            | 1239.16 | [1195.84, 1282.91] | 562               |
| L317K            | 436.49  | [397.03, 477.46]   | 145               |
| L317H            | 932.7   | [897.68, 967.47]   | 626               |
| L302D            | 519.48  | [492.15, 549.41]   | 541               |
| L302R            | 258.63  | [248.38, 271.61]   | 769               |
| L302G            | 322.53  | [309.5, 335.76]    | 707               |
| L302H            | 255.27  | [246.09, 264.53]   | 851               |
| L302C            | 276.18  | [265.04, 287.55]   | 707               |
| A390Y            | 149.82  | [142.29, 157.56]   | 606               |
| A390R            | 906.15  | [884.21, 927.9]    | 882               |
| P303D            | 620.06  | [598.72, 641.78]   | 787               |
| jGCaMP7s         | 489.93  | [469.53, 510.23]   | 631               |
| P303W            | 716.15  | [691.97, 740.69]   | 635               |
| P303F            | 889.13  | [863.36, 914.67]   | 1072              |
| G392F            | 932.41  | [896.26, 969.28]   | 450               |
| G392W            | 1119.84 | [1085.01, 1154.64] | 573               |

Supplementary Table 3:  $\Delta F/F_0$  Descriptive Statistics of Ensemble Prediction Screen Results

The table contains the information displayed in Figure 3B. The table contains the construct (Variant), the mean  $\Delta F/F_0$  (%), the 95% confidence interval (95% CI), and the number of samples (ROIs Measured (n)).



| Model                   | Accuracy | Precision |
|-------------------------|----------|-----------|
| Random Chance (50/50)   | 0.5      | 0.5       |
| Fluorescence + Kinetics | 0.66     | 0.91      |
| Fluorescence            | 0.56     | 1         |
| Kinetics                | 0.75     | 0.86      |

Supplementary Table 4: *Precision and Accuracy Quantifications of Model Predictions*  
Quantification of each model's accuracy (Eq.6) and precision (Eq.7).

| Tau (s)  |        |                  |                   |
|----------|--------|------------------|-------------------|
| Variant  | Mean   | 95% CI           | ROIs Measured (n) |
| A390Y    | 124.72 | [116.65, 133.5]  | 606               |
| L302C    | 181.63 | [170.57, 193.2]  | 707               |
| L302D    | 139.24 | [127.55, 151.71] | 541               |
| L302R    | 100.29 | [93.8, 107.2]    | 769               |
| A390R    | 66.75  | [64.23, 69.38]   | 882               |
| L302G    | 218.24 | [204.23, 232.75] | 707               |
| L302H    | 132.81 | [127.34, 138.61] | 851               |
| P303F    | 118.52 | [112.54, 125.0]  | 1072              |
| P303W    | 94.61  | [89.19, 100.68]  | 635               |
| jGCaMP7s | 99.6   | [92.02, 107.83]  | 631               |
| G392F    | 70.51  | [65.82, 75.64]   | 450               |
| G392W    | 65.17  | [60.42, 70.23]   | 573               |
| L317H    | 28.75  | [25.54, 32.31]   | 626               |
| P303D    | 113.24 | [107.3, 119.51]  | 787               |
| L317K    | 4.65   | [4.26, 5.08]     | 145               |
| L317N    | 28.94  | [25.49, 33.0]    | 608               |
| L317E    | 35.16  | [31.7, 39.14]    | 562               |

Supplementary Table 5: *Decay Descriptive Statistics of Ensemble Prediction Screen Results*

The table contains the information displayed in Figure 3C. The table contains the construct (Variant), the mean Tau (s), the 95% confidence interval (95% CI), and the number of samples (ROIs Measured (n)).

| Variant ID | 52 | 317 | 374 | 1 AP<br>$\Delta F/F_0$ |
|------------|----|-----|-----|------------------------|
| 10.1473    | V  | L   | M   | 5.120                  |
| 10.915     | A  | D   | M   | 0.380                  |
| 10.1129    | A  | D   | M   | 0.240                  |
| 67         | A  | E   | M   | 0.085                  |
| 361        | A  | E   | M   | 0.214                  |
| 362        | A  | E   | M   | 0.140                  |
| 500        | A  | E   | M   | 0.285                  |
| 608        | A  | E   | M   | 0.129                  |
| 609        | A  | E   | M   | 0.153                  |
| 610        | A  | E   | M   | 0.262                  |
| 611        | A  | E   | M   | 0.155                  |
| 612        | A  | E   | M   | 0.288                  |
| 613        | A  | E   | M   | 0.737                  |
| 630        | A  | E   | M   | 0.329                  |
| 631        | A  | E   | M   | 0.241                  |
| 632        | A  | E   | M   | 0.209                  |
| 633        | A  | E   | M   | 0.110                  |
| 642        | A  | E   | M   | 0.419                  |
| 644        | A  | E   | M   | 0.279                  |
| 645        | A  | E   | M   | 0.220                  |
| 646        | A  | E   | M   | 0.319                  |
| 647        | A  | E   | M   | 0.311                  |
| 648        | A  | E   | M   | 0.209                  |
| 649        | A  | E   | M   | 0.427                  |
| 663        | A  | E   | M   | 0.123                  |
| 664        | A  | E   | M   | 0.244                  |
| 684        | A  | E   | M   | 0.155                  |
| 685        | A  | E   | M   | 0.197                  |
| 686        | A  | E   | M   | 0.173                  |
| 687        | A  | E   | M   | 0.150                  |
| 688        | A  | E   | M   | 0.131                  |
| 689        | A  | E   | M   | 0.098                  |
| 690        | A  | E   | M   | 0.164                  |
| 691        | A  | E   | M   | 0.147                  |
| 692        | A  | E   | M   | 0.068                  |
| 10.1083    | A  | E   | M   | 0.610                  |
| 10.1087    | A  | E   | M   | 0.740                  |

| Variant ID                | 52 | 317 | 374 | 1 AP<br>$\Delta F/F_0$ |
|---------------------------|----|-----|-----|------------------------|
| 10.1088                   | A  | E   | M   | 0.650                  |
| 10.1097                   | A  | E   | M   | 0.270                  |
| 10.1098                   | A  | E   | M   | 0.640                  |
| 10.1112                   | A  | E   | M   | 0.280                  |
| 10.1113                   | A  | E   | M   | 0.760                  |
| 10.1117                   | A  | E   | M   | 0.430                  |
| 10.1118                   | A  | E   | M   | 0.430                  |
| 10.1119                   | A  | E   | M   | 0.420                  |
| 10.1124                   | A  | E   | M   | 0.490                  |
| 10.1125                   | A  | E   | M   | 0.290                  |
| 10.1126                   | A  | E   | M   | 0.340                  |
| 10.1127                   | A  | E   | M   | 0.900                  |
| 10.1128                   | A  | E   | M   | 0.320                  |
| 10.1136                   | A  | E   | M   | 0.600                  |
| 10.1206                   | A  | E   | M   | 0.260                  |
| 10.1207                   | A  | E   | M   | 0.280                  |
| 10.1212                   | A  | E   | M   | 0.160                  |
| 10.1217                   | A  | E   | M   | 0.590                  |
| 10.1227                   | A  | E   | M   | 0.740                  |
| 10.1228                   | A  | E   | M   | 0.210                  |
| 10.1229                   | A  | E   | M   | 0.510                  |
| 10.124                    | A  | E   | M   | 0.140                  |
| 10.1251                   | A  | E   | M   | 0.500                  |
| 10.1253                   | A  | E   | M   | 0.320                  |
| 10.1257                   | A  | E   | M   | 0.010                  |
| ['GCaMP6f',<br>'GCaMP6f'] | A  | E   | M   | 0.618                  |
| ['68', '10.916']          | A  | E   | M   | 0.205                  |
| ['10.1175', '10.1182']    | A  | E   | M   | 0.565                  |
| ['10.1239', '10.1243']    | A  | E   | M   | 0.375                  |
| ['10.108', '10.123']      | A  | E   | M   | 0.625                  |
| ['10.1234', '10.1236']    | A  | E   | M   | 0.550                  |
| ['10.1241', '10.1258']    | A  | E   | M   | 0.500                  |
| ['10.1177', '10.1186']    | A  | E   | M   | 0.355                  |
| 10.1035                   | A  | H   | M   | 0.150                  |
| 10.1259                   | A  | H   | M   | 0.280                  |
| 10.92                     | A  | K   | M   | 0.210                  |
| 10.923                    | A  | N   | M   | 0.380                  |
| 10.1166                   | A  | N   | M   | 0.480                  |

Supplementary Table 6: *Previously Described 317 Variants*

Values are derived from the Chen *et al.* 2013 and Dana *et al.* 2019 variant library, rows contain the identification number of the cataloged variant (Index), the variants' amino acid identities at residues 52, 317, and 374 (52, 317, 374), and the normalized  $\Delta F/F_0$  at 1 AP ( $\Delta F/F_0$ : 1AP). jGCaMP7s is included in the first row as it's Dana *et al.* 2019 derived identity (10.1473).

| SNR (a.u.) |        |                  |                   |
|------------|--------|------------------|-------------------|
| Variant    | Mean   | 95% CI           | ROIs Measured (n) |
| jGCaMP7s   | 251.74 | [234.83, 269.59] | 631               |
| L302C      | 138.67 | [131.24, 146.11] | 707               |
| L302D      | 319.8  | [297.64, 342.55] | 541               |
| L302G      | 428.67 | [405.3, 452.19]  | 707               |
| L302H      | 146.09 | [136.89, 155.66] | 851               |
| L302R      | 98.1   | [92.87, 104.14]  | 769               |
| P303D      | 455.22 | [429.31, 482.85] | 787               |
| P303F      | 357.71 | [341.91, 373.36] | 1072              |
| P303W      | 343.9  | [325.42, 363.0]  | 635               |
| L317E      | 810.13 | [753.73, 866.7]  | 562               |
| L317K      | 133.79 | [117.73, 151.03] | 145               |
| L317H      | 854.35 | [808.94, 899.55] | 626               |
| L317N      | 586.23 | [541.01, 636.35] | 608               |
| A390R      | 559.12 | [533.85, 585.68] | 882               |
| A390Y      | 41.99  | [39.03, 45.06]   | 606               |
| G392F      | 471.71 | [441.75, 502.39] | 450               |
| G392W      | 590.15 | [557.76, 623.86] | 573               |

Supplementary Table 7: *SNR Descriptive Statistics of Ensemble Prediction Screen Results*

The table contains the information displayed in Figure 3D. The table contains the construct (Variant), the mean signal-to-noise ratio (SNR) (Mean), the 95% confidence interval (95% CI), and the number of samples (ROIs Measured (n)).

| Performance Score (a.u.) |       |                |                   |
|--------------------------|-------|----------------|-------------------|
| Variant                  | Mean  | 95% CI         | ROIs Measured (n) |
| jGCaMP7s                 | 3.83  | [3.51, 4.15]   | 631               |
| L302C                    | 1.22  | [1.11, 1.34]   | 707               |
| L302D                    | 4.02  | [3.6, 4.47]    | 541               |
| L302G                    | 3.65  | [3.09, 4.45]   | 707               |
| L302H                    | 1.46  | [1.34, 1.59]   | 851               |
| L302R                    | 1.68  | [1.43, 2.06]   | 769               |
| P303D                    | 5.43  | [5.03, 5.85]   | 787               |
| P303F                    | 4.42  | [4.17, 4.69]   | 1072              |
| P303W                    | 5.02  | [4.67, 5.38]   | 635               |
| L317E                    | 35.48 | [32.71, 38.38] | 562               |
| L317K                    | 32.71 | [28.56, 37.26] | 145               |
| L317H                    | 54.49 | [51.17, 57.92] | 626               |
| L317N                    | 34.89 | [32.0, 37.85]  | 608               |
| A390R                    | 10.4  | [9.84, 10.98]  | 882               |
| A390Y                    | 0.51  | [0.46, 0.56]   | 606               |
| G392F                    | 9.31  | [8.5, 10.13]   | 450               |
| G392W                    | 12.84 | [11.83, 13.94] | 573               |

Supplementary Table 8: *Performance Score Descriptive Statistics of Ensemble Prediction Screen Results*

The table contains the information displayed in Figure 3E. The table contains the construct (Variant), the mean Performance Score (Mean), the 95% confidence interval (95% CI), and the number of samples (ROIs Measured (n)).

| Tau (s)        |                                         |       |                 |                   |
|----------------|-----------------------------------------|-------|-----------------|-------------------|
| Variant        | Acetylcholine Stimuli ( $\mu\text{M}$ ) | Mean  | 95% CI          | ROIs Measured (n) |
| L317H, L302G   | 10                                      | 13.82 | [12.91, 14.78]  | 608               |
| jGCaMP7s       | 10                                      | 99.6  | [92.15, 107.49] | 631               |
| L317H, L302H   | 10                                      | 21.86 | [19.91, 24.12]  | 779               |
| L317H, A390R   | 10                                      | 21.83 | [20.57, 23.24]  | 1492              |
| eGCaMP (L317H) | 10                                      | 28.75 | [25.57, 32.35]  | 626               |
| L317H, P303D   | 10                                      | 17.61 | [16.02, 19.49]  | 757               |
| L317H, L302D   | 10                                      | 15.59 | [14.03, 17.49]  | 801               |
| L317H, Q305D   | 10                                      | 27.39 | [24.62, 30.51]  | 659               |

Supplementary Table 9: *Decay Descriptive Statistics of Combinatorial Variants*

The table contains the information displayed in Supplementary Figure 7B. The table contains the construct (Variant), the concentration of acetylcholine (Acetylcholine Stimuli ( $\mu\text{M}$ )), the mean Tau (s) (Mean), the 95% confidence interval (95% CI), and the number of samples (ROIs Measured (n)).

| $\Delta F/F_0$ (%) |                                         |         |                    |                   |
|--------------------|-----------------------------------------|---------|--------------------|-------------------|
| Variant            | Acetylcholine Stimuli ( $\mu\text{M}$ ) | Mean    | 95% CI             | ROIs Measured (n) |
| L317H, L302G       | 10                                      | 401.8   | [387.48, 416.08]   | 608               |
| jGCaMP7s           | 10                                      | 489.93  | [469.11, 510.71]   | 631               |
| L317H, L302H       | 10                                      | 758.06  | [738.7, 777.22]    | 779               |
| L317H, A390R       | 10                                      | 892.11  | [875.99, 908.27]   | 1492              |
| eGCaMP (L317H)     | 10                                      | 932.7   | [897.84, 967.47]   | 626               |
| L317H, P303D       | 10                                      | 942.58  | [916.89, 968.52]   | 757               |
| L317H, L302D       | 10                                      | 1098.63 | [1070.71, 1126.54] | 801               |
| L317H, Q305D       | 10                                      | 2407    | [2335.38, 2478.47] | 659               |

Supplementary Table 10:  $\Delta F/F_0$  Descriptive Statistics of Combinatorial Variants

The table contains the information displayed in Figure 4E. The table contains the construct (Variant), the concentration of acetylcholine (Acetylcholine Stimuli ( $\mu\text{M}$ )), the mean  $\Delta F/F_0$  (Mean), the 95% confidence interval (95% CI), and the number of samples (ROIs Measured (n)).



| SNR (a.u.)     |                                         |         |                    |                   |
|----------------|-----------------------------------------|---------|--------------------|-------------------|
| Variant        | Acetylcholine Stimuli ( $\mu\text{M}$ ) | Mean    | 95% CI             | ROIs Measured (n) |
| L317H, L302G   | 10                                      | 97.7    | [91.52, 104.22]    | 608               |
| jGCaMP7s       | 10                                      | 251.74  | [234.96, 269.24]   | 631               |
| L317H, L302H   | 10                                      | 471.92  | [454.95, 489.27]   | 779               |
| L317H, A390R   | 10                                      | 430.55  | [413.14, 448.84]   | 1492              |
| eGCaMP (L317H) | 10                                      | 854.35  | [809.76, 901.75]   | 626               |
| L317H, P303D   | 10                                      | 531.58  | [504.94, 558.54]   | 757               |
| L317H, L302D   | 10                                      | 702.85  | [672.35, 733.8]    | 801               |
| L317H, Q305D   | 10                                      | 1271.48 | [1200.07, 1343.99] | 659               |

Supplementary Table 11: *SNR Descriptive Statistics of Combinatorial Variants*

The table contains the information displayed in Supplementary Figure 7B. The table contains the construct (Variant), the concentration of acetylcholine (Acetylcholine Stimuli ( $\mu\text{M}$ )), the mean SNR (Mean), the 95% confidence interval (95% CI), and the number of samples (ROIs Measured (n)).

| SNR/Tau (a.u.) |                                         |      |        |                   |
|----------------|-----------------------------------------|------|--------|-------------------|
| Variant        | Acetylcholine Stimuli ( $\mu\text{M}$ ) | Mean | 95% CI | ROIs Measured (n) |

|                |    |       |                |      |
|----------------|----|-------|----------------|------|
| L317H, L302G   | 10 | 10.35 | [9.56, 11.17]  | 608  |
| jGCaMP7s       | 10 | 3.83  | [3.51, 4.15]   | 631  |
| L317H, L302H   | 10 | 35.66 | [33.73, 37.61] | 779  |
| L317H, A390R   | 10 | 27.58 | [26.26, 29.05] | 1492 |
| eGCaMP (L317H) | 10 | 54.49 | [51.21, 57.96] | 626  |
| L317H, P303D   | 10 | 44.43 | [41.78, 47.16] | 757  |
| L317H, L302D   | 10 | 62.97 | [59.92, 66.04] | 801  |
| L317H, Q305D   | 10 | 74.62 | [69.97, 79.53] | 659  |

Supplementary Table 12: *SNR/Tau Descriptive Statistics of Combinatorial Variants*

The table contains the information displayed in Figure 4F. The table contains the construct (Variant), the concentration of acetylcholine (Acetylcholine Stimuli ( $\mu\text{M}$ )), the mean SNR/Tau (Mean), the 95% confidence interval (95% CI), and the number of samples (ROIs Measured (n)).

| Concentration ( $\mu\text{M}$ ) | Variant  | Mean $\Delta F/F_0$ (%) | SEM   | Samples (n) |
|---------------------------------|----------|-------------------------|-------|-------------|
| 10.0                            | GCaMP6s  | 542.0576957490350       | 16.3  | 1218        |
| 10.0                            | GCaMP6f  | 580.0599817630100       | 19.75 | 776         |
| 10.0                            | jGCaMP7s | 309.66659364822100      | 8.69  | 1401        |
| 10.0                            | jGCaMP7f | 776.2219775641050       | 8.83  | 1883        |
| 10.0                            | jGCaMP8s | 189.8974402543510       | 4.34  | 1129        |
| 10.0                            | jGCaMP8m | 257.06451324858200      | 4.63  | 1514        |
| 10.0                            | jGCaMP8f | 268.4993953371440       | 5.21  | 1288        |
| 10.0                            | eGCaMP   | 724.4879489890530       | 14.36 | 1618        |
| 10.0                            | eGCaMP2+ | 1567.5173223331000      | 24.54 | 1924        |
| 10.0                            | eGCaMP+  | 1162.094675384620       | 21.91 | 1467        |

Supplementary Table 13:  $\Delta F/F_0$  Descriptive Statistics of  $10\mu\text{M}$  Acetylcholine Stimulus

The table contains the concentration of the acetylcholine stimulus (Concentration ( $\mu\text{M}$ )), the construct (Variant), the mean response (Mean  $\Delta F/F_0$  (%)), the standard error of the mean (SEM), and the number of samples (Samples (n)).

| Concentration ( $\mu\text{M}$ ) | Variant  | Mean $\Delta F/F_0$ (%) | SEM   | Samples (n) |
|---------------------------------|----------|-------------------------|-------|-------------|
| 5.0                             | GCaMP6s  | 529.343955352201        | 14.26 | 1275        |
| 5.0                             | GCaMP6f  | 582.7062640702780       | 14.46 | 1355        |
| 5.0                             | jGCaMP7s | 332.8529265633950       | 10.67 | 910         |
| 5.0                             | jGCaMP7f | 743.6582692870790       | 7.57  | 1867        |
| 5.0                             | jGCaMP8s | 194.30823094856800      | 4.17  | 1143        |
| 5.0                             | jGCaMP8m | 250.46020535142500      | 5.08  | 1203        |
| 5.0                             | jGCaMP8f | 256.31216255142000      | 4.69  | 1358        |
| 5.0                             | eGCaMP   | 715.4126616948510       | 14.6  | 1527        |
| 5.0                             | eGCaMP2+ | 1526.9948613182700      | 26.47 | 1448        |
| 5.0                             | eGCaMP+  | 1171.9621473829300      | 23.31 | 1161        |

Supplementary Table 14:  $\Delta F/F_0$  Descriptive Statistics of  $5\mu\text{M}$  Acetylcholine Stimulus

The table contains the concentration of the acetylcholine stimulus (Concentration ( $\mu\text{M}$ )), the construct (Variant), the mean response (Mean  $\Delta F/F_0$  (%)), the standard error of the mean (SEM), and the number of samples (Samples (n)).

| Concentration ( $\mu\text{M}$ ) | Variant  | Mean $\Delta F/F_0$ (%) | SEM   | Samples (n) |
|---------------------------------|----------|-------------------------|-------|-------------|
| 1.0                             | GCaMP6s  | 389.1751755671520       | 18.02 | 785         |
| 1.0                             | GCaMP6f  | 447.78850813463900      | 19.66 | 584         |
| 1.0                             | jGCaMP7s | 271.939682741784        | 11.82 | 686         |
| 1.0                             | jGCaMP7f | 542.3482366328280       | 9.69  | 1524        |
| 1.0                             | jGCaMP8s | 188.80805475510900      | 5.06  | 749         |
| 1.0                             | jGCaMP8m | 203.66560060670000      | 6.75  | 760         |
| 1.0                             | jGCaMP8f | 200.35393958757700      | 5.39  | 1065        |
| 1.0                             | eGCaMP   | 497.4989626023940       | 15.62 | 1000        |
| 1.0                             | eGCaMP2+ | 1389.2302765905300      | 29.65 | 1125        |
| 1.0                             | eGCaMP+  | 698.0678991857000       | 21.61 | 996         |

Supplementary Table 15:  $\Delta F/F_0$  Descriptive Statistics of  $1\mu\text{M}$  Acetylcholine Stimulus

The table contains the concentration of the acetylcholine stimulus (Concentration ( $\mu\text{M}$ )), the construct (Variant), the mean response (Mean  $\Delta F/F_0$  (%)), the standard error of the mean (SEM), and the number of samples (Samples (n)).

| Concentration ( $\mu\text{M}$ ) | Variant  | Mean $\Delta F/F_0$ (%) | SEM   | Samples (n) |
|---------------------------------|----------|-------------------------|-------|-------------|
| 0.75                            | GCaMP6s  | 329.4149698176440       | 15.49 | 804         |
| 0.75                            | GCaMP6f  | 429.4997942849410       | 14.13 | 1016        |
| 0.75                            | jGCaMP7s | 268.2510926313680       | 9.28  | 1006        |
| 0.75                            | jGCaMP7f | 477.93217506889600      | 9.81  | 1361        |
| 0.75                            | jGCaMP8s | 135.61875283648100      | 4.28  | 805         |
| 0.75                            | jGCaMP8m | 173.8268266918370       | 5.27  | 983         |
| 0.75                            | jGCaMP8f | 164.20390709877900      | 3.92  | 1671        |
| 0.75                            | eGCaMP   | 474.7734111076490       | 11.93 | 1666        |
| 0.75                            | eGCaMP2+ | 1079.6686913867400      | 26.0  | 1278        |
| 0.75                            | eGCaMP+  | 648.4762047315260       | 19.95 | 1034        |

Supplementary Table 16:  $\Delta F/F_0$  Descriptive Statistics of  $0.75\mu\text{M}$  Acetylcholine Stimulus

The table contains the concentration of the acetylcholine stimulus (Concentration ( $\mu\text{M}$ )), the construct (Variant), the mean response (Mean  $\Delta F/F_0$  (%)), the standard error of the mean (SEM), and the number of samples (Samples (n)).

| Concentration ( $\mu\text{M}$ ) | Variant  | Mean $\Delta F/F_0$ (%) | SEM   | Samples (n) |
|---------------------------------|----------|-------------------------|-------|-------------|
| 0.5                             | GCaMP6s  | 290.844910478741        | 14.57 | 826         |
| 0.5                             | GCaMP6f  | 293.7001358695750       | 18.37 | 657         |
| 0.5                             | jGCaMP7s | 223.09331472361800      | 11.05 | 846         |
| 0.5                             | jGCaMP7f | 442.48651191810300      | 9.13  | 1574        |
| 0.5                             | jGCaMP8s | 151.1790419548550       | 6.43  | 462         |
| 0.5                             | jGCaMP8m | 157.38969324099700      | 5.01  | 1035        |
| 0.5                             | jGCaMP8f | 128.5803460675330       | 4.69  | 1100        |
| 0.5                             | eGCaMP   | 350.11532966689300      | 12.21 | 1175        |
| 0.5                             | eGCaMP2+ | 1033.0644958159400      | 25.58 | 1353        |
| 0.5                             | eGCaMP+  | 644.6372960966310       | 19.25 | 1121        |

Supplementary Table 17:  $\Delta F/F_0$  Descriptive Statistics of 0.5 $\mu\text{M}$  Acetylcholine Stimulus

The table contains the concentration of the acetylcholine stimulus (Concentration ( $\mu\text{M}$ )), the construct (Variant), the mean response (Mean  $\Delta F/F_0$  (%)), the standard error of the mean (SEM), and the number of samples (Samples (n)).

| Concentration ( $\mu\text{M}$ ) | Variant  | Mean $\Delta F/F$ (%) | SEM   | Samples (n) |
|---------------------------------|----------|-----------------------|-------|-------------|
| 0.25                            | GCaMP6s  | 105.54097548728200    | 15.68 | 302         |
| 0.25                            | GCaMP6f  | 128.21780442992800    | 12.6  | 491         |
| 0.25                            | jGCaMP7s | 156.54839686698600    | 11.77 | 453         |
| 0.25                            | jGCaMP7f | 214.02339937468600    | 7.26  | 1577        |
| 0.25                            | jGCaMP8s | 102.7639405766460     | 5.92  | 477         |
| 0.25                            | jGCaMP8m | 91.12941574591900     | 4.29  | 935         |
| 0.25                            | jGCaMP8f | 79.27533088088380     | 4.02  | 934         |
| 0.25                            | eGCaMP   | 249.34280073848800    | 13.68 | 784         |
| 0.25                            | eGCaMP2+ | 546.5026204926650     | 18.21 | 1471        |
| 0.25                            | eGCaMP+  | 313.18723778004700    | 15.23 | 976         |

Supplementary Table 18:  $\Delta F/F_0$  Descriptive Statistics of 0.25 $\mu\text{M}$  Acetylcholine Stimulus

The table contains the concentration of the acetylcholine stimulus (Concentration ( $\mu\text{M}$ )), the construct (Variant), the mean response (Mean  $\Delta F/F_0$  (%)), the standard error of the mean (SEM), and the number of samples (Samples (n)).



| Concentration ( $\mu\text{M}$ ) | Variant  | Mean $\Delta F/F_0$ (%) | SEM   | Samples (n) |
|---------------------------------|----------|-------------------------|-------|-------------|
| 0.1                             | GCaMP6s  | 78.83819697878870       | 14.76 | 474         |
| 0.1                             | GCaMP6f  | 50.79367750011170       | 13.63 | 356         |
| 0.1                             | jGCaMP7s | 77.28006581708250       | 9.16  | 381         |
| 0.1                             | jGCaMP7f | 81.90602739824190       | 4.79  | 1385        |
| 0.1                             | jGCaMP8s | 58.181684834710300      | 5.5   | 300         |
| 0.1                             | jGCaMP8m | 35.943127649074500      | 3.16  | 626         |
| 0.1                             | jGCaMP8f | 40.4984093431018        | 3.1   | 937         |
| 0.1                             | eGCaMP   | 71.75163612188040       | 6.5   | 896         |
| 0.1                             | eGCaMP2+ | 205.68795282465300      | 14.34 | 807         |
| 0.1                             | eGCaMP+  | 145.3234198499200       | 10.61 | 808         |

Supplementary Table 19:  $\Delta F/F_0$  Descriptive Statistics of 0.1  $\mu\text{M}$  Acetylcholine Stimulus

The table contains the concentration of the acetylcholine stimulus (Concentration ( $\mu\text{M}$ )), the construct (Variant), the mean response (Mean  $\Delta F/F_0$  (%)), the standard error of the mean (SEM), and the number of samples (Samples (n)).

| Concentration ( $\mu\text{M}$ ) | Variant  | Tau Off (s) | SEM  | Samples (n) |
|---------------------------------|----------|-------------|------|-------------|
| 5                               | GCaMP6s  | 72.31       | 3.06 | 940         |
| 5                               | GCaMP6f  | 24.58       | 1.03 | 1357        |
| 5                               | jGCaMP7s | 100.9       | 4.27 | 676         |
| 5                               | jGCaMP7f | 45.97       | 1.42 | 2088        |
| 5                               | jGCaMP8s | 30.44       | 0.69 | 1379        |
| 5                               | jGCaMP8m | 32.28       | 1.19 | 1325        |
| 5                               | jGCaMP8f | 33.52       | 1.13 | 1457        |
| 5                               | eGCaMP   | 34.02       | 1.49 | 1564        |
| 5                               | eGCaMP2+ | 39.02       | 1.74 | 1509        |
| 5                               | eGCaMP+  | 18.13       | 0.79 | 1297        |

Supplementary Table 20: *Decay Descriptive Statistics of 5 $\mu\text{M}$  Acetylcholine Stimulus*

The table contains the concentration of the acetylcholine stimulus (Concentration ( $\mu\text{M}$ )), the construct (Variant), the speed of off-decay (Tau Off (s)), the standard error of the mean (SEM), and the number of samples (Samples (n)).

| Sensor   | Kd (nM)              | Hill Coefficient       | $\epsilon$ (Saturated)<br>(x1000)<br>(M <sup>-1</sup> cm <sup>-1</sup> ) | $\phi$ (Saturated) |
|----------|----------------------|------------------------|--------------------------------------------------------------------------|--------------------|
| GCaMP6s  | 120.8 [110.6, 132.2] | 2.014 [1.716, 2.387]   | N/A                                                                      | N/A                |
| GCaMP6f  | 291.3 [256.4, 333.1] | 1.857 [1.544, 2.261]   | 65.276                                                                   | 0.6                |
| jGCaMP7s | 46.2 [39.3, 53.7]    | 2.138 [1.596, 1.918]   | N/A                                                                      | N/A                |
| eGCaMP   | 354.8 [262.8, 516.4] | 1.761 [1.087, 3.339]   | 62.726                                                                   | 0.68               |
| eGCaMP2+ | 358.7 [310.4, 418.8] | 1.925 [1.540, 2.461]   | 60.070                                                                   | 0.72               |
| eGCaMP+  | 1885 [1.082, 34.02]  | 0.9976 [0.4875, 1.871] | 58.988                                                                   | 0.63               |

Supplementary Table 21: *Photophysical Properties of Purified eGCaMP Proteins*

The table contains the construct (Sensor), dissociation constant [95% CI] (Kd (nM)), hill coefficient [95% CI], extinction coefficient ( $\epsilon$ (Saturated)(x1000)(M<sup>-1</sup> cm<sup>-1</sup>)), and quantum yield ( $\phi$  (Saturated)). N/A indicates not acquired. All properties were measured in purified protein solutions (*Methods*).

| 1 AP               |         |         |          |          |        |                     |                      |
|--------------------|---------|---------|----------|----------|--------|---------------------|----------------------|
| Construct          | GCaMP6s | GCaMP6f | jGCaMP7s | jGCaMP8f | eGCaMP | eGCaMP <sup>+</sup> | eGCaMP <sup>2+</sup> |
| Number of values   | 33      | 48      | 102      | 72       | 56     | 49                  | 47                   |
| Mean               | 3.911   | 2.626   | 6.252    | 8.438    | 2.783  | 3.026               | 10.1                 |
| Std. Deviation     | 3.197   | 5.021   | 11.51    | 18.88    | 2.845  | 3.702               | 16.25                |
| Std. Error of Mean | 0.5564  | 0.7247  | 1.139    | 2.225    | 0.3802 | 0.5289              | 2.371                |

Supplementary Table 22: *Descriptive Statistics of Primary Neuron Responses to 1AP*

The table contains the construct (Construct), the number of samples (Number of Values), the mean  $\Delta F/F_0$  (%) response (Mean), the standard deviation (Std. Deviation), and the standard error of the mean (Std. Error of Mean) to 1 AP stimulus.

| 10 AP              |         |         |          |          |        |                     |                      |
|--------------------|---------|---------|----------|----------|--------|---------------------|----------------------|
| Construct          | GCaMP6s | GCaMP6f | jGCaMP7s | jGCaMP8f | eGCaMP | eGCaMP <sup>+</sup> | eGCaMP <sup>2+</sup> |
| Number of values   | 49      | 55      | 134      | 50       | 82     | 77                  | 53                   |
| Mean               | 43.77   | 20.99   | 48.53    | 31.94    | 37.81  | 30.54               | 113.8                |
| Std. Deviation     | 53.41   | 34.86   | 57.84    | 35.49    | 50.59  | 64.68               | 207.4                |
| Std. Error of Mean | 7.63    | 4.701   | 4.996    | 5.019    | 5.587  | 7.371               | 28.49                |

Supplementary Table 23: *Descriptive Statistics of Primary Neuron Responses to 10AP*

The table contains the construct (Construct), the number of samples (Number of Values), the mean  $\Delta F/F_0$  (%) response (Mean), the standard deviation (Std. Deviation), and the standard error of the mean (Std. Error of Mean) to 10AP stimulus.

| 80 AP              |         |         |          |          |        |                     |                      |
|--------------------|---------|---------|----------|----------|--------|---------------------|----------------------|
| Construct          | GCaMP6s | GCaMP6f | jGCaMP7s | jGCaMP8f | eGCaMP | eGCaMP <sup>+</sup> | eGCaMP <sup>2+</sup> |
| Number of values   | 49      | 63      | 111      | 72       | 88     | 86                  | 54                   |
| Mean               | 276.1   | 114.6   | 142.4    | 84.28    | 275.3  | 190.4               | 502.5                |
| Std. Deviation     | 252.1   | 173.6   | 126.7    | 64.44    | 243.7  | 193.1               | 370.1                |
| Std. Error of Mean | 36.01   | 21.87   | 12.03    | 7.594    | 25.97  | 20.82               | 50.37                |

Supplementary Table 24: *Descriptive Statistics of Primary Neuron Responses to 80AP*

The table contains the construct (Construct), the number of samples (Number of Values), the mean  $\Delta F/F_0$  (%) response (Mean), the standard deviation (Std. Deviation), and the standard error of the mean (Std. Error of Mean) to 80AP stimulus.

| 40 mM KCl          |         |         |          |          |        |                     |                      |
|--------------------|---------|---------|----------|----------|--------|---------------------|----------------------|
| Construct          | GCaMP6s | GCaMP6f | jGCaMP7s | jGCaMP8f | eGCaMP | eGCaMP <sup>+</sup> | eGCaMP <sup>2+</sup> |
| Number of values   | 82      | 44      | 121      | 15       | 96     | 29                  | 92                   |
| Mean               | 940.5   | 333.3   | 546.4    | 233.2    | 928.8  | 833.5               | 2110                 |
| Std. Deviation     | 465.3   | 253.7   | 239.1    | 89.34    | 445.1  | 572.1               | 1009                 |
| Std. Error of Mean | 51.39   | 38.24   | 21.74    | 23.07    | 45.43  | 106.2               | 105.2                |

Supplementary Table 25: *Descriptive Statistics of Primary Neuron Responses to 40mM KCl*

The table contains the construct (Construct), the number of samples (Number of Values), the mean  $\Delta F/F_0$  (%) response (Mean), the standard deviation (Std. Deviation), and the standard error of the mean (Std. Error of Mean) to 40mM KCl.

| 10 AP Decay        |         |         |          |          |        |                     |                      |
|--------------------|---------|---------|----------|----------|--------|---------------------|----------------------|
| Construct          | GCaMP6s | GCaMP6f | jGCaMP7s | jGCaMP8f | eGCaMP | eGCaMP <sup>+</sup> | eGCaMP <sup>2+</sup> |
| Number of values   | 16      | 44      | 70       | 47       | 75     | 62                  | 43                   |
| Mean               | 4.37    | 0.9547  | 9.479    | 1.49     | 1.168  | 0.7355              | 2.099                |
| Std. Deviation     | 2.583   | 0.4496  | 5.487    | 0.9786   | 0.5577 | 0.6476              | 1.595                |
| Std. Error of Mean | 0.6457  | 0.06778 | 0.6558   | 0.1427   | 0.0644 | 0.08225             | 0.2433               |

Supplementary Table 26: *Descriptive Statistics of Primary Neuron Responses Half Decay to 10AP*

The table contains the construct (Construct), number of samples (Number of Values), the mean half decay time (s) (Mean), the standard deviation (Std. Deviation), and the standard error of the mean (Std. Error of Mean) after 10 AP stimuli.
